# Supplementary material for: Mechanistic insight into selective catalytic combustion of acrylonitrile (C2H3CN): NCO formation and its further transformation towards N2
Source: Royal Society of Chemistry journal article supplement (doi:10.1039/c6cp08930e), 2017-01-01
Supplement: c6cp08930e1.pdf [file c6cp08930e1.pdf]

## Supplementary Information

### Mechanistic Insight into Selective Catalytic Combustion of Acrylonitrile (C<sub>2</sub>H<sub>3</sub>CN): NCO Formation and its Further Transformation towards N<sub>2</sub>

*Ning Liu<sup>a,b</sup>, Xiaoning Yuan<sup>a</sup>, Runduo Zhang<sup>a\*</sup>, RongRong Xu<sup>a</sup>, Yingxia Li<sup>a</sup>*

<sup>a</sup>State Key Laboratory of Chemical Resource Engineering, Beijing University of  
Chemical Technology, Beijing, 100029 China

<sup>b</sup>Changzhou Institute of Advanced Materials, Beijing University of Chemical  
Technology, Changzhou, 213164, China

Corresponding authors:

[zhangrd@mail.buct.edu.cn](mailto:zhangrd@mail.buct.edu.cn) (Runduo Zhang)

Tel: 86-10-64412054; Fax: 86-10-64419619

|                                                                                                                                                                              |           |
|------------------------------------------------------------------------------------------------------------------------------------------------------------------------------|-----------|
| Microkinetic analysis                                                                                                                                                        | <b>S1</b> |
| Schematic reaction mechanism of AN-SCC over Cu-ZSM-5 derived from in-situ<br>DRIFTS (Scheme S1)                                                                              | <b>S3</b> |
| Energy barrier of each reaction route and optimized geometrical parameters of models<br>utilized in the DFT mechanism simulations (Table S1)                                 | <b>S4</b> |
| Simulated IR vibration frequencies of free and adsorbed acrylonitrile on 20T-O-Cu-<br>Z <sub>20</sub> with respect of the literature report and the DRIFTS result (Table S2) | <b>S6</b> |

## Microkinetic analysis

Reaction rate constant ( $k$ ) was calculated based on the harmonic transition state theory (HTST) using the classic equation<sup>23</sup> as formulated in Eq. (1.1).

$$k = \frac{k_B T}{h} \left(\frac{P^\theta}{RT}\right)^{1-n} \exp\left(\frac{-\Delta_r G_m^\theta(P^\theta)}{RT}\right) \quad (1.1),$$

where  $k_B$  is Boltzmann constant;  $\Delta_r G_m^\theta(P^\theta)$  stands for the standard molar activation Gibbs energy;  $n$  is the coefficient amount of the reactants as well as  $h$ ,  $T$ , and  $R$  respectively denote Plank constant, temperature, and gas constant. The Eq. (1.1) can also be formulated as Eq. (1.2) according to the basic thermodynamic formula  $\Delta_r G_m^\theta(P^\theta) = \Delta_r H_m^\theta(P^\theta) - T\Delta_r S_m^\theta(P^\theta)$ , where  $\Delta_r H_m^\theta(P^\theta)$  and  $\Delta_r S_m^\theta(P^\theta)$  represent the standard molar activation enthalpy and entropy, respectively.

$$k = \frac{k_B T}{h} \left(\frac{P^\theta}{RT}\right)^{1-n} \exp\left(\frac{\Delta_r S_m^\theta(P^\theta)}{R}\right) \exp\left(\frac{-\Delta_r H_m^\theta(P^\theta)}{RT}\right) \quad (1.2)$$

Moreover, the activation energy ( $E_a$ ) can be correlated with the  $\Delta_r H_m^\theta(P^\theta)$  according to the Eq. (1.3), where  $n_1$  represents the coefficient amount of the gaseous reactants. For the condensed phase reaction the value of  $n_1$  is 1.

$$E_a = \Delta_r H_m^\theta(P^\theta) + n_1 RT \quad (1.3)$$

Finally, we got the final reaction rate constant formulated as Eq. (1.4) by including the Eq. (1.3) into the Eq. (1.2).

$$k = \frac{k_B T}{h} e^{n_1} \left(\frac{P^\theta}{RT}\right)^{1-n} \exp\left(\frac{\Delta_r S_m^\theta(P^\theta)}{R}\right) \exp\left(\frac{-E_a}{RT}\right) \quad (1.4)$$

Comparing Eq. (1.4) with the Arrhenius equation, the preexponential factor ( $A$ ) can be calculated as the Eq. (1.5).

$$A = \frac{k_B T}{h} e^{n_1} \left(\frac{P^\theta}{RT}\right)^{1-n} \exp\left(\frac{\Delta_r S_m^\theta(P^\theta)}{R}\right) \quad (1.5)$$

The activation energy ( $E_a$ ) can be calculated according to the energy barrier of each reaction step [from the reactant state (RS) to the TS] during the DFT energy calculations. The entropy containing three contributions, vibrational, rotational, and translational degrees of freedom, was calculated by the frequency calculations of DFT at 1 atm and 298.15 K. The  $\Delta_r S_m^\theta(P^\theta)$  was calculated according to Eq. (1.6).

$$\Delta_r S_m^\theta(P^\theta) = S_{TS}^\theta(P^\theta) - S_{RS}^\theta(P^\theta) \quad (1.6)$$

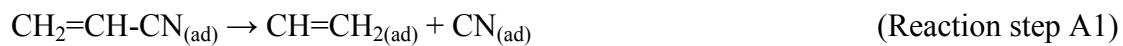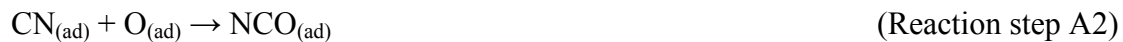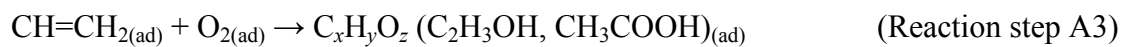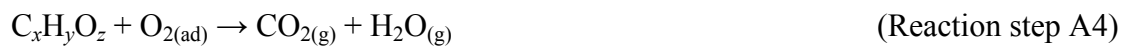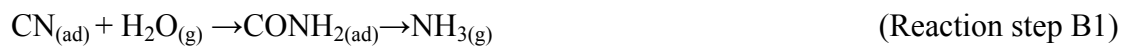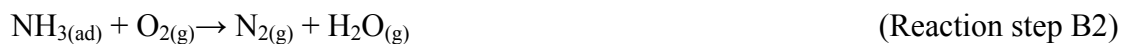

**Scheme S1.** Schematic reaction mechanism of AN-SCC over Cu-ZSM-5 derived from in-situ DRIFTS.

**Table S1** Energy barrier of each reaction route (unit of kcal mol<sup>-1</sup>) and optimized geometrical parameters of models utilized in the DFT mechanism simulations (distances in Å, angles in °)

| Route                                         | Energy Barrier/<br>kcal mol <sup>-1</sup> | Structures                                      | Gas phase | 1 <sup>a</sup> | 2 <sup>b</sup> | 3 <sup>c</sup> |
|-----------------------------------------------|-------------------------------------------|-------------------------------------------------|-----------|----------------|----------------|----------------|
| I                                             | 17.0                                      | Cu-N                                            | -         | 1.97           | 1.81           | 1.82           |
|                                               |                                           | Cu-O                                            | -         | 2.11           | 3.93           | -              |
|                                               |                                           | C <sub>1</sub> -N                               | 1.16      | 1.35           | 1.24           | 1.22           |
|                                               |                                           | C <sub>1</sub> -O                               | -         | 1.29           | 1.20           | 1.18           |
|                                               |                                           | C <sub>1</sub> -C <sub>2</sub>                  | 1.43      | 1.46           | 2.14           | 3.17           |
|                                               |                                           | C <sub>2</sub> -C <sub>3</sub>                  | 1.34      | 1.34           | 1.31           | 1.31           |
|                                               |                                           | ∠N-C <sub>1</sub> -O                            | -         | 111.0          | 155.0          | 177.1          |
|                                               |                                           | ∠N-C <sub>1</sub> -C <sub>2</sub>               | 180.0     | 125.9          | -              | -              |
| II                                            | 100.9                                     | ∠C <sub>1</sub> -C <sub>2</sub> -C <sub>3</sub> | 122.9     | 121.1          | -              | -              |
|                                               |                                           | Cu-N                                            | -         | 1.82           | 1.90           | 1.90           |
|                                               |                                           | N-C                                             | 1.23      | 1.21           | 2.16           | -              |
|                                               |                                           | C-O                                             | 1.19      | 1.18           | 1.14           | 1.14           |
| III                                           | 48.7                                      | ∠NCO                                            | 180.0     | 177.6          | -              | -              |
|                                               |                                           | Cu-N <sub>1</sub>                               | -         | 1.97           | 1.87           | -              |
|                                               |                                           | N <sub>1</sub> -N <sub>2</sub>                  | -         | 1.40           | 1.29           | 1.10           |
|                                               |                                           | N <sub>1</sub> -C <sub>1</sub>                  | 1.23      | 1.25           | 1.25           | -              |
|                                               |                                           | C <sub>1</sub> -O <sub>1</sub>                  | 1.19      | 1.16           | 1.17           | 1.14           |
|                                               |                                           | N <sub>2</sub> -C <sub>2</sub>                  | -         | 1.24           | 1.92           | -              |
|                                               |                                           | C <sub>2</sub> -O <sub>2</sub>                  | -         | 1.17           | 1.14           | 1.14           |
|                                               |                                           | ∠N <sub>1</sub> C <sub>1</sub> O <sub>1</sub>   | 180.0     | 174.9          | 161.6          | -              |
| ∠N <sub>2</sub> C <sub>2</sub> O <sub>2</sub> | -                                         | 169.8                                           | 126.9     | -              |                |                |
| IV                                            | 7.8                                       | Cu-O <sub>1</sub>                               | -         | 1.88           | 2.78           | -              |
|                                               |                                           | O <sub>1</sub> -N                               | -         | 1.38           | 1.21           | 1.15           |
|                                               |                                           | N-C                                             | 1.23      | 1.25           | 1.55           | -              |
|                                               |                                           | C-O <sub>2</sub>                                | 1.19      | 1.17           | 1.16           | 1.14           |
|                                               |                                           | ∠NCO <sub>2</sub>                               | 180       | 167.3          | 134.9          | -              |
| V                                             | 0.8                                       | Cu-N <sub>1</sub>                               | -         | 2.02           | 2.01           | -              |
|                                               |                                           | N <sub>1</sub> -N <sub>2</sub>                  | -         | 1.30           | 1.23           | 1.11           |
|                                               |                                           | N <sub>1</sub> -C                               | 1.23      | 1.49           | 1.61           | -              |
|                                               |                                           | C-O <sub>1</sub>                                | 1.19      | 1.17           | 1.17           | 1.16           |

|    |      |                                               |       |       |       |       |
|----|------|-----------------------------------------------|-------|-------|-------|-------|
|    |      | N <sub>2</sub> -O <sub>2</sub>                | 1.16  | 1.47  | 1.74  |       |
|    |      | C-O <sub>2</sub>                              | -     | 1.40  | 1.32  | 1.18  |
|    |      | ∠N <sub>1</sub> CO <sub>1</sub>               | 180   | 137.1 | 128.7 |       |
|    |      | ∠C <sub>1</sub> O <sub>1</sub> O <sub>2</sub> | -     | 132.4 | 136.6 | 175.9 |
|    |      | Cu-N <sub>1</sub>                             | -     | 1.91  | -     | 1.91  |
|    |      | N <sub>1</sub> -C                             | 1.23  | 1.22  | 1.65  | -     |
|    |      | C-O <sub>1</sub>                              | 1.19  | 1.18  | 1.15  | 1.14  |
|    |      | N <sub>1</sub> -N <sub>2</sub>                | -     | 2.11  | 1.24  | 1.13  |
| VI | 31.0 | N <sub>2</sub> -O <sub>2</sub>                | 1.16  | 1.14  | 1.21  | 1.18  |
|    |      | ∠N <sub>1</sub> CO <sub>1</sub>               | 180.0 | 176.1 | 129.5 | -     |
|    |      | ∠N <sub>1</sub> N <sub>2</sub> O              | -     | -     | 131.8 | 179.8 |

<sup>a</sup> Adsorption state (AS)

<sup>b</sup> Transition state (TS)

<sup>c</sup> Product

**Table S2** The calculated vibration frequencies of free and adsorbed acrylonitrile on 20T-O-Cu-Z<sub>20</sub> with respect of the literature report and the DRIFTS result.

| Vibration mode     | IR frequency of gaseous AN <sup>26</sup> | Calculated IR frequency of gaseous AN | DRIFTS result of adsorbed AN | Calculated result of adsorbed AN <sup>a</sup> |
|--------------------|------------------------------------------|---------------------------------------|------------------------------|-----------------------------------------------|
| $\delta_s(-CH_2)$  | 1416                                     | 1406                                  | 1414                         | 1446                                          |
| $\nu(C_2=C_3)$     | 1615                                     | 1631                                  | -                            | 1627                                          |
| $\nu(C_1\equiv N)$ | 2239                                     | 2258                                  | 2267                         | -                                             |
| $\nu(N=C_1=O)$     | -                                        | -                                     | 2213                         | 2248                                          |
| $\nu_s(-CH_2)$     | 3042                                     | 3061                                  | 3035                         | 3070                                          |
| $\nu(-CH)$         | 3078                                     | 3072                                  | 3077                         | 3109                                          |
| $\nu_{as}(-CH_2)$  | 3116                                     | 3148                                  | 3121                         | 3158                                          |

<sup>a</sup>The frequency correction factor is 0.9613
